# Supplementary material for: Antioxidant and Cytotoxic Properties of Berberis vulgaris (L.) Stem Bark Dry Extract
Source: MDPI journal article supplement (doi:10.3390/molecules29092053), 2024-04-29
Supplement: s1 [file s1]

Supplementary Material

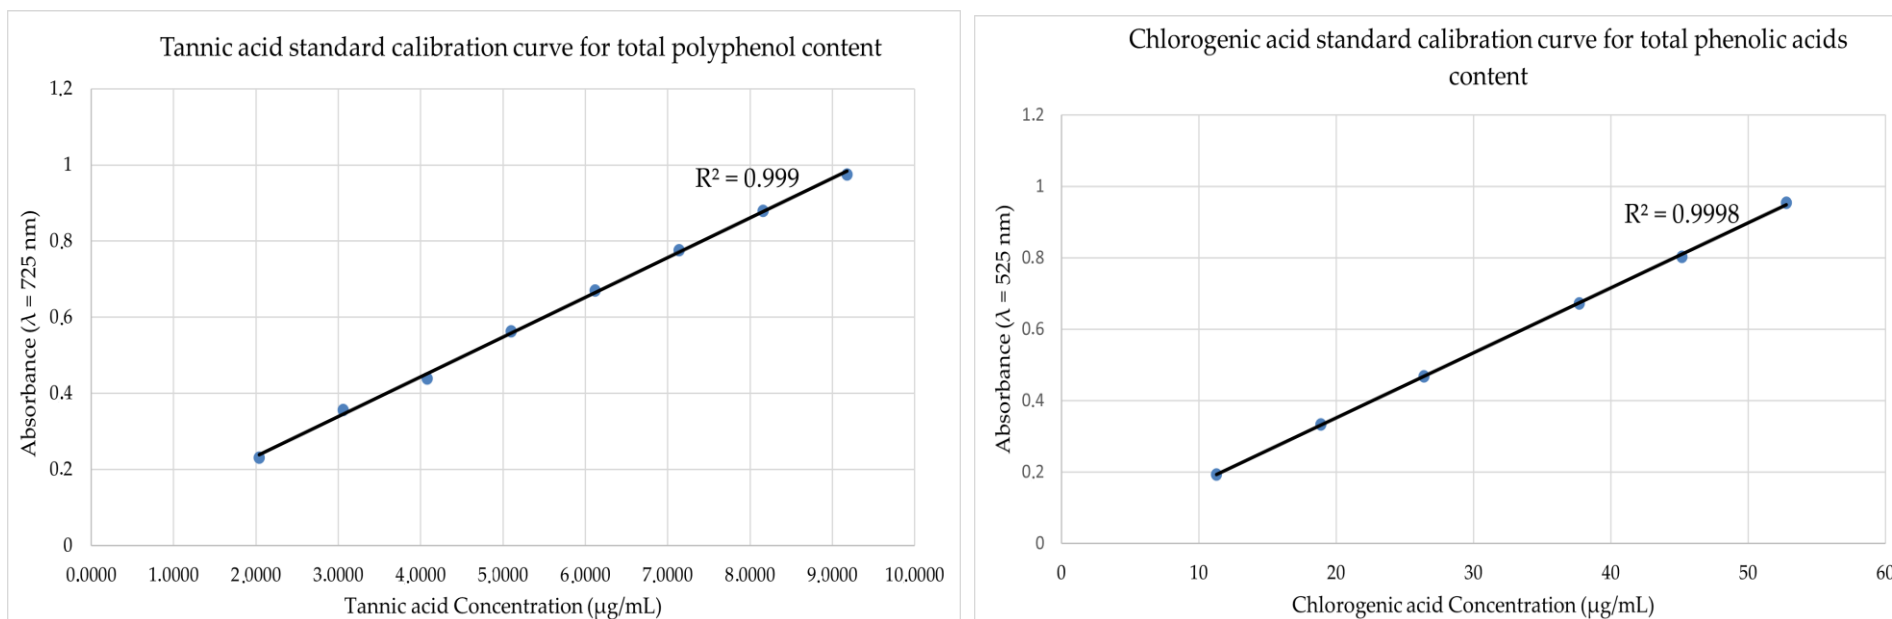

**Figure S1.** Standard calibration curves for TPC (left) and TPA (right).

**Table S1.** The antiproliferative effects of positive controls on normal cell and tumor cell lines after 24 and 48 hours of exposure.

| Exposure Time         |                               | 24 h                          |                             |                               |  |
|-----------------------|-------------------------------|-------------------------------|-----------------------------|-------------------------------|--|
| 5-Fluorouracil        |                               |                               |                             |                               |  |
| Cell line             | HUVEC                         | LoVo                          | HT-29                       | HEP G2                        |  |
| [5-FU]                | Cell viability % (mean ± SD)  |                               |                             |                               |  |
| 3.125 µM              | 103.33 ± 7.05                 | 94.26 ± 2.18                  | 96.79 ± 3.59                | 98.04 ± 6.87                  |  |
| 6.25 µM               | 102.78 ± 4.50                 | 88.04 ± 1.45                  | 92.31 ± 2.01                | 93.56 ± 0.52                  |  |
| 12.5 µM               | 101.29 ± 2.46                 | 79.31 ± 1.55                  | 84.11 ± 2.69                | 84.10 ± 4.83                  |  |
| 25 µM                 | 103.74 ± 1.39                 | 74.22 ± 3.82                  | 80.87 ± 0.05                | 78.12 ± 3.61                  |  |
| 50 µM                 | 101.54 ± 7.05                 | 62.41 ± 4.00                  | 68.69 ± 4.01                | 66.85 ± 7.08                  |  |
| 100 µM                | 102.60 ± 4.92                 | 46.00 ± 2.91                  | 54.74 ± 1.42                | 52.64 ± 3.15                  |  |
| 200 µM                | 99.36 ± 3.36 <sup>a,b,x</sup> | 34.27 ± 2.82 <sup>a,c,y</sup> | 47.40 ± 4.59 <sup>a,z</sup> | 41.69 ± 6.47 <sup>b,c,w</sup> |  |
| IC <sub>50</sub> (µM) | >200                          | <100                          | <200                        | <200                          |  |
| Cisplatin             |                               |                               |                             |                               |  |
| Cell line             | HUVEC                         | SK-OV-3                       | PE/CA-PJ49                  |                               |  |
| [CisPt]               | Cell viability % (mean ± SD)  |                               |                             |                               |  |
| 3.125 µM              | 104.65 ± 4.15                 | 99.76 ± 3.65                  | 99.21 ± 1.17                |                               |  |
| 6.25 µM               | 102.12 ± 4.10                 | 98.44 ± 0.78                  | 97.87 ± 1.51                |                               |  |
| 12.5 µM               | 101.95 ± 3.69                 | 95.24 ± 2.21                  | 90.77 ± 0.82                |                               |  |
| 25 µM                 | 102.35 ± 3.20                 | 88.20 ± 3.82                  | 86.01 ± 3.02                |                               |  |
| 50 µM                 | 101.10 ± 2.21                 | 79.43 ± 2.50                  | 68.49 ± 4.98                |                               |  |
| 100 µM                | 100.04 ± 4.08                 | 67.88 ± 0.95                  | 44.95 ± 5.19                |                               |  |
| 200 µM                | 85.58 ± 4.62 <sup>a,x</sup>   | 52.61 ± 4.17 <sup>a,y</sup>   | 32.13 ± 4.12 <sup>a,z</sup> |                               |  |
| IC <sub>50</sub> (µM) | >200                          | >200                          | <100                        |                               |  |
| Doxorubicin           |                               |                               |                             |                               |  |
| Cell line             | HUVEC                         | SK-OV-3                       | MDA-MB-231                  |                               |  |
| [DOX]                 | Cell viability % (mean ± SD)  |                               |                             |                               |  |
| 0.625 µM              | 103.67 ± 1.97                 | 98.66 ± 1.91                  | 90.65 ± 2.20                |                               |  |
| 1.25 µM               | 101.56 ± 2.79                 | 96.06 ± 1.07                  | 77.14 ± 4.67                |                               |  |
| 2.5 µM                | 102.59 ± 3.20                 | 93.55 ± 1.67                  | 72.99 ± 0.92                |                               |  |
| 5 µM                  | 100.49 ± 5.24                 | 89.00 ± 0.36                  | 62.86 ± 4.78                |                               |  |
| 10 µM                 | 101.74 ± 1.31                 | 82.22 ± 1.91                  | 55.71 ± 1.65                |                               |  |
| 20 µM                 | 100.64 ± 0.41                 | 71.81 ± 2.62                  | 44.81 ± 3.02                |                               |  |
| 40 µM                 | 98.87 ± 5.49 <sup>a,x</sup>   | 61.59 ± 1.85 <sup>a,y</sup>   | 33.38 ± 6.90 <sup>a,z</sup> |                               |  |

| IC <sub>50</sub> (μM) | >40                           | >40                           | >40                         |                             |
|-----------------------|-------------------------------|-------------------------------|-----------------------------|-----------------------------|
| Exposure Time         | 48 h                          |                               |                             |                             |
| 5-Fluorouracil        |                               |                               |                             |                             |
| Cell line             | HUVEC                         | LoVo                          | HT-29                       | HEP G2                      |
| [5-FU]                | Cell viability% (mean ± SD)   |                               |                             |                             |
| 3.125 μM              | 105.50 ± 1.72                 | 90.30 ± 4.50                  | 93.08 ± 4.25                | 96.77 ± 5.75                |
| 6.25 μM               | 103.63 ± 2.04                 | 82.36 ± 2.19                  | 82.16 ± 4.62                | 90.00 ± 1.79                |
| 12.5 μM               | 102.48 ± 4.96                 | 66.02 ± 5.61                  | 77.37 ± 1.70                | 81.00 ± 3.47                |
| 25 μM                 | 99.02 ± 3.36                  | 59.92 ± 3.98                  | 71.50 ± 5.12                | 69.12 ± 0.27                |
| 50 μM                 | 96.51 ± 2.42                  | 49.30 ± 2.93                  | 55.21 ± 1.25                | 56.93 ± 4.15                |
| 100 μM                | 93.99 ± 2.29                  | 31.94 ± 3.57                  | 42.78 ± 1.76                | 46.97 ± 5.44                |
| 200 μM                | 88.63 ± 4.52 <sup>a,b,x</sup> | 13.25 ± 3.49 <sup>a,b,y</sup> | 28.24 ± 7.59 <sup>a,z</sup> | 25.50 ± 6.68 <sup>b,w</sup> |
| IC <sub>50</sub> (μM) | >200                          | <50                           | <100                        | <100                        |
| Cisplatin             |                               |                               |                             |                             |
| Cell line             | HUVEC                         | SK-OV-3                       | PE/CA-PJ49                  |                             |
| [CisPt]               | Cell viability % (mean ± SD)  |                               |                             |                             |
| 3.125 μM              | 101.2 ± 2.35                  | 94.34 ± 4.56                  | 97.08 ± 3.45                |                             |
| 6.25 μM               | 100.68 ± 1.46                 | 82.70 ± 1.88                  | 90.37 ± 4.75                |                             |
| 12.5 μM               | 96.43 ± 5.70                  | 75.19 ± 0.27                  | 84.28 ± 1.60                |                             |
| 25 μM                 | 86.59 ± 0.38                  | 67.87 ± 1.72                  | 73.16 ± 4.26                |                             |
| 50 μM                 | 78.02 ± 3.12                  | 55.38 ± 6.05                  | 60.26 ± 6.52                |                             |
| 100 μM                | 68.79 ± 1.02                  | 34.32 ± 3.97                  | 33.06 ± 5.19                |                             |
| 200 μM                | 55.80 ± 1.97 <sup>b,c,x</sup> | 29.77 ± 2.04 <sup>b,y</sup>   | 21.18 ± 6.53 <sup>c,z</sup> |                             |
| IC <sub>50</sub> (μM) | >200                          | <100                          | <100                        |                             |
| Doxorubicin           |                               |                               |                             |                             |
| Cell line             | HUVEC                         | SK-OV-3                       | MDA-MB-231                  |                             |
| [DOX]                 | Cell viability % (mean ± SD)  |                               |                             |                             |
| 0.625 μM              | 101.08 ± 0.57                 | 88.91 ± 2.58                  | 85.04 ± 0.95                |                             |
| 1.25 μM               | 103.29 ± 5.41                 | 81.30 ± 2.63                  | 74.76 ± 0.51                |                             |
| 2.5 μM                | 101.15 ± 4.07                 | 77.86 ± 1.13                  | 68.99 ± 3.58                |                             |
| 5 μM                  | 100.26 ± 1.78                 | 71.86 ± 4.35                  | 53.84 ± 6.21                |                             |
| 10 μM                 | 94.72 ± 0.95                  | 62.91 ± 1.18                  | 46.51 ± 4.30                |                             |
| 20 μM                 | 91.97 ± 2.04                  | 55.54 ± 1.07                  | 37.81 ± 6.33                |                             |
| 40 μM                 | 90.02 ± 0.00 <sup>b,x</sup>   | 36.42 ± 3.43 <sup>b,y</sup>   | 19.21 ± 1.91 <sup>b,z</sup> |                             |

| IC <sub>50</sub> (μM)                                                                                                                                                                                                                                                                                                                                                                                                                                                                                                                                                                                                                                                                                                                                                                                         | >40 | <40 | <10 |
|---------------------------------------------------------------------------------------------------------------------------------------------------------------------------------------------------------------------------------------------------------------------------------------------------------------------------------------------------------------------------------------------------------------------------------------------------------------------------------------------------------------------------------------------------------------------------------------------------------------------------------------------------------------------------------------------------------------------------------------------------------------------------------------------------------------|-----|-----|-----|
| HUVEC — human umbilical endothelial cells; HEP G2 — human hepatocellular carcinoma; HT-29 and LoVo — human colon adenocarcinomas; MDA-MB-231 —human breast adenocarcinoma; PE/CA-PJ49 — human squamous tongue carcinoma; SK-OV-3 — human ovary adenocarcinoma; SD—standard deviation. The superscript letters indicate the significant statistical differences ( $p < 0.05$ ): <sup>a, b, c, d</sup> in the same column, between rows; <sup>x, y, z</sup> in the same row, between columns. Interpretation of IC <sub>50</sub> values is based on [16]: IC <sub>50</sub> ≤ 10 μM = good cytotoxicity, 10 μM < IC <sub>50</sub> ≤ 30 μM = low cytotoxicity; IC <sub>50</sub> > 30 μM = inactive. Data shown are expressed as mean values ± standard deviations (SD) of three different experiments ( $n = 3$ ) |     |     |     |

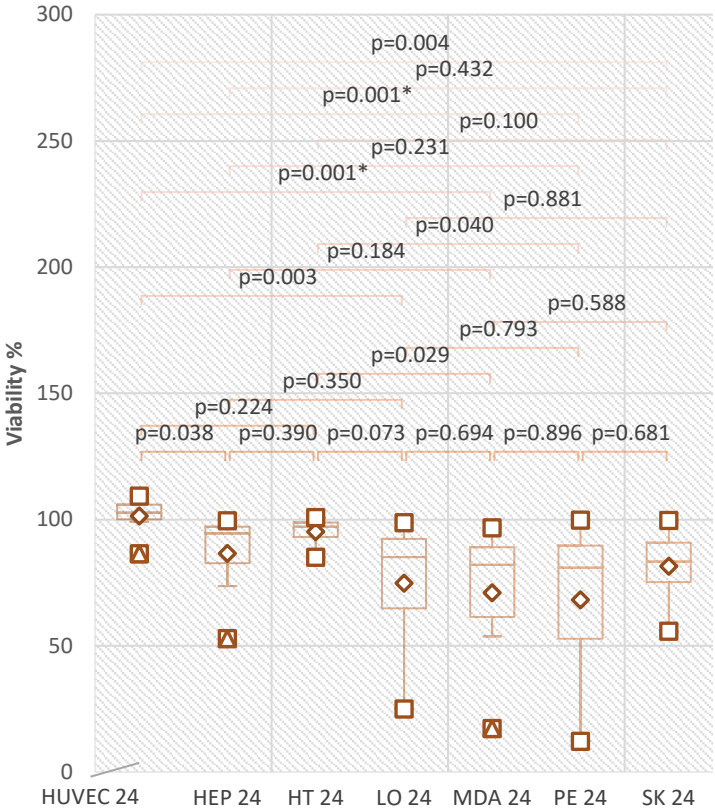

(a)

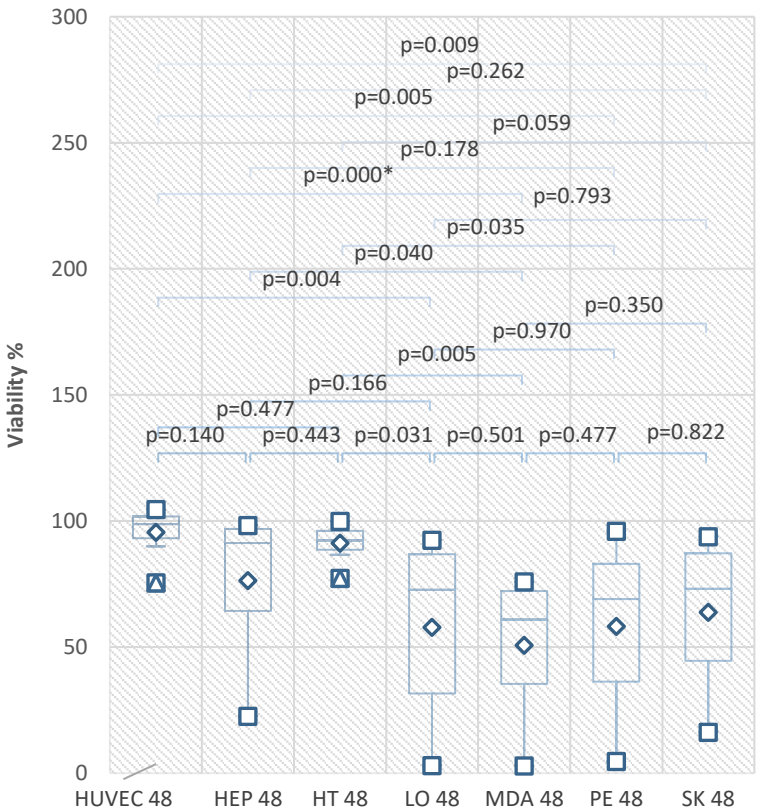

(b)

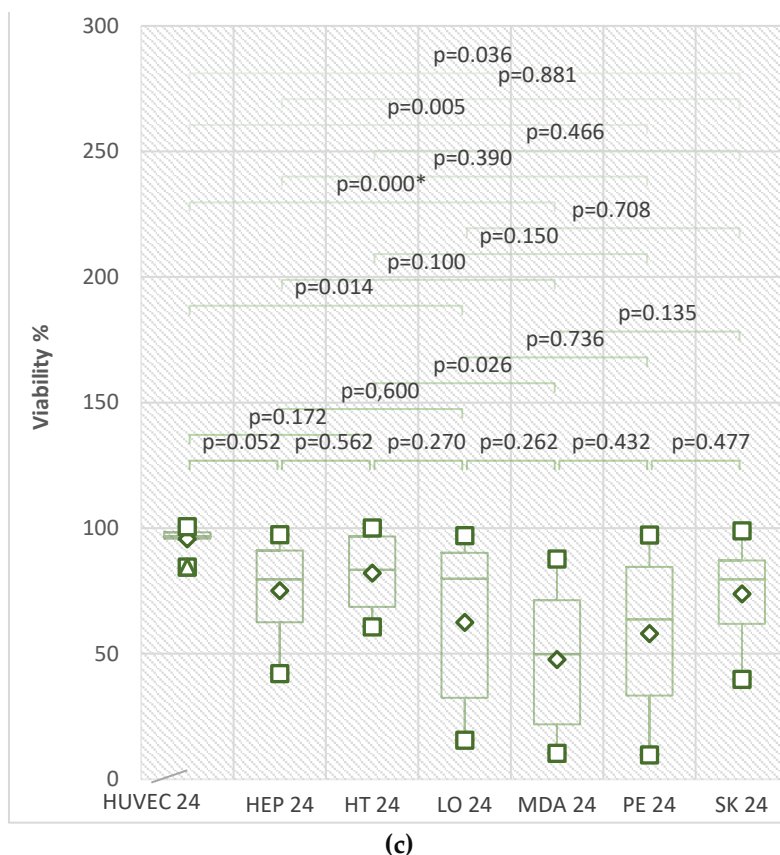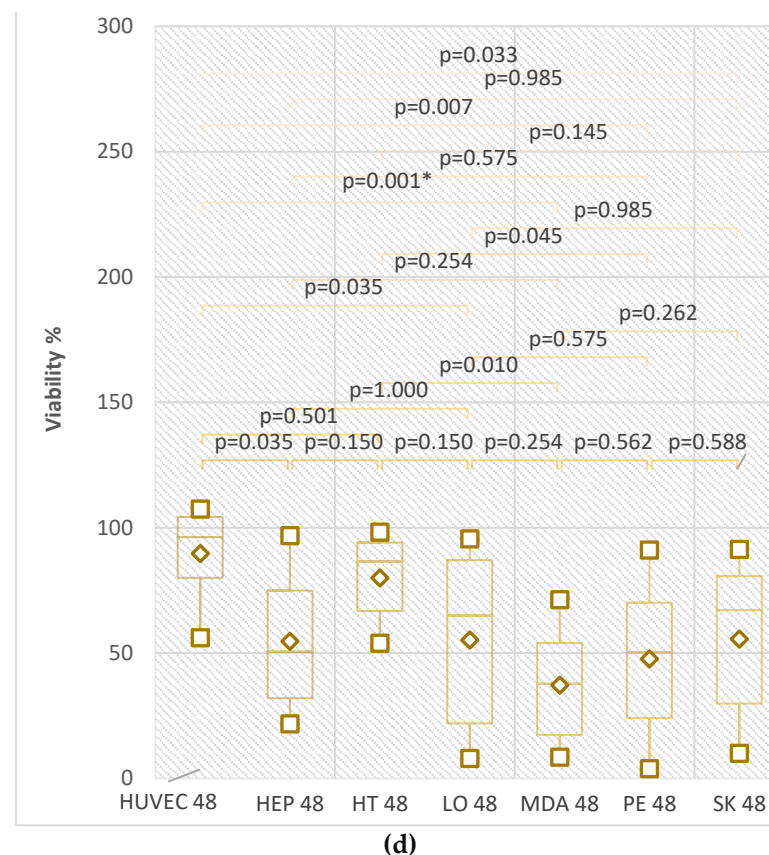

**Figure S2.** The viability% (V%) of normal and tumor cells exposed to BVE (a,b) and BS (c,d) various concentrations for 24 h (a,c) and 48 h (b,d). Bonferroni-corrected significance level at  $\alpha = 0.05$  is 0,0024; \*p-value < 0.024 corresponds to  $\alpha < 0,05$  and shows statistically significant differences. HUVEC — human umbilical endothelial cell; HUV—HUVEC — human umbilical endothelial cell; HEP—HEP G2 — human hepatocellular carcinoma; HT—HT-29 and LO—LoVo — human colon adenocarcinomas; MDA—MDA-MB-231 —human breast adenocarcinoma; PE—PE/CA-PJ49 — human squamous tongue carcinoma; SK—SK-OV-3 — human ovary adenocarcinoma; 24 and 48 —period of exposure (hours); c — control (BS); BVE—*B. vulgaris* dry hydro-ethanol extract; BS—Berberine standard.

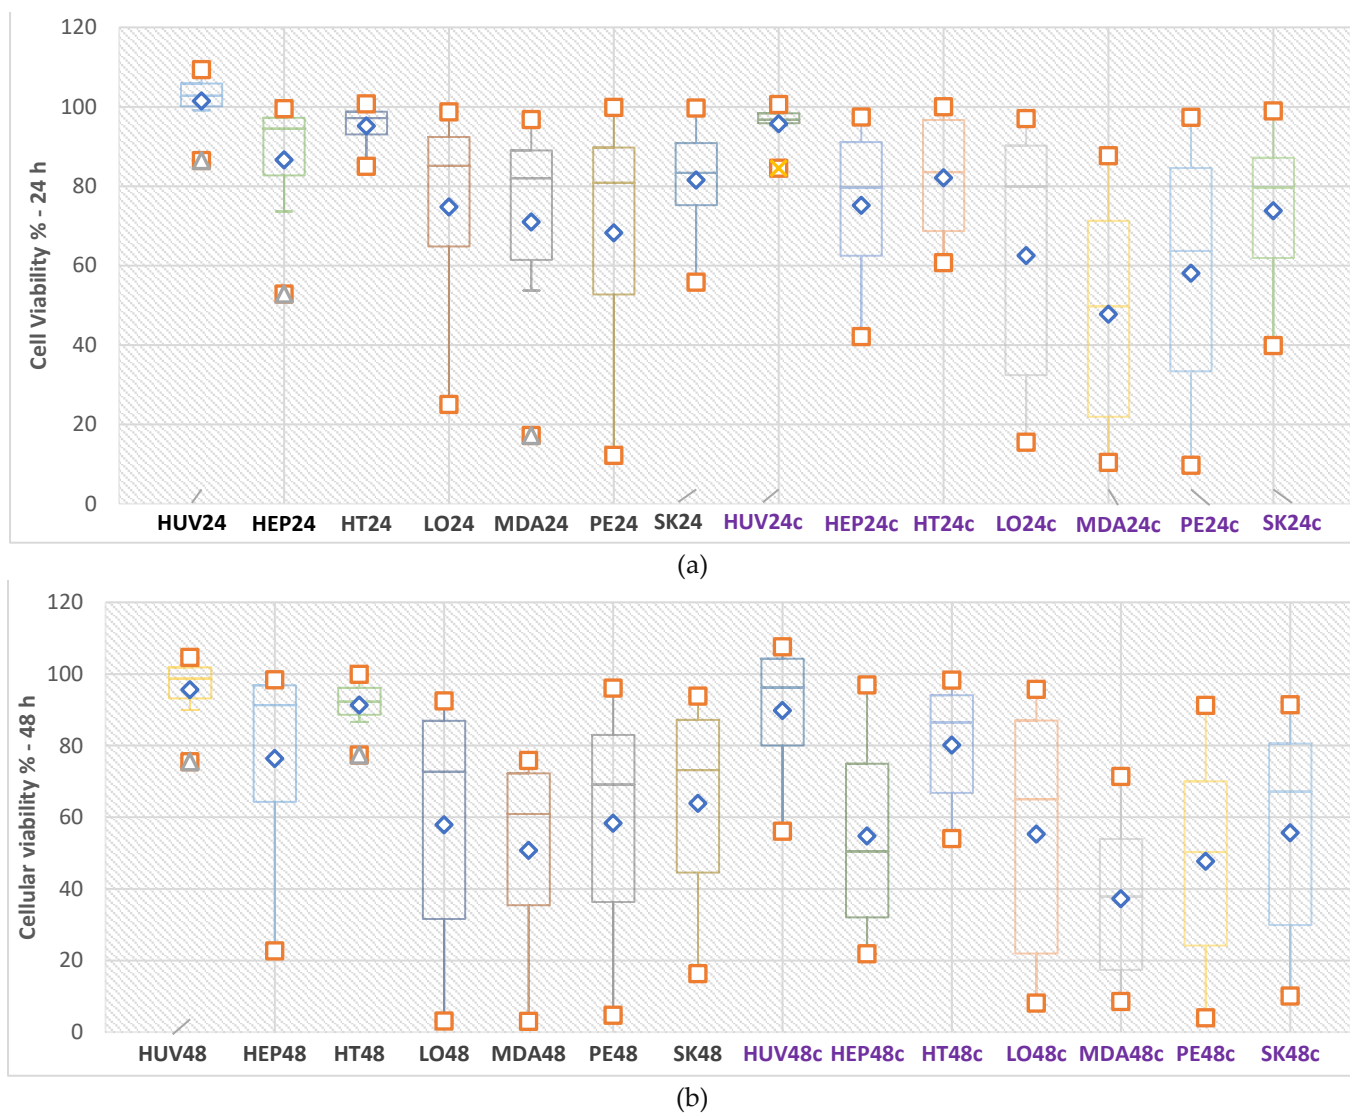

**Figure S3.** Comparison between BVE and BS cytotoxicity (quantified as cell viability %) after 24 h (a) and 48 h (b) of contact. HUV—HUVEC — human umbilical endothelial cell; HEP—HEP G2 — human hepatocellular carcinoma; HT—HT-29 and LO—LoVo — human colon adenocarcinomas; MDA—MDA-MB-231 —human breast adenocarcinoma; PE—PE/CA-PJ49 — human squamous tongue carcinoma; SK—SK-OV-3 — human ovary adenocarcinoma; 24 and 48 —period of exposure (hours); c — control (BS); BVE—*B. vulgaris* dry hydro-ethanol extract; BS—Berberine standard

**Table S2.** Pearson correlation between the cytotoxic effects of BVE, BS, and anticancer drugs (expressed as cell viability %) after 24 and 48 hours of treatment on tested cell lines

| Variables | BVE24        | BS24         | CisPt24      | 5-FU24       | DOX24        | BVE48        | BS48     | CisPt48      | 5-FU48   | DOX48    |
|-----------|--------------|--------------|--------------|--------------|--------------|--------------|----------|--------------|----------|----------|
| BVE24     | <b>1</b>     |              |              |              |              |              |          |              |          |          |
| BS24      | <b>0.906</b> | <b>1</b>     |              |              |              |              |          |              |          |          |
| CisPt24   | 0.469        | 0.644        | <b>1</b>     |              |              |              |          |              |          |          |
| 5-FU24    | 0.619        | <b>0.813</b> | 0.414        | <b>1</b>     |              |              |          |              |          |          |
| DOX24     | 0.573        | 0.747        | <b>0.934</b> | 0.482        | <b>1</b>     |              |          |              |          |          |
| BVE48     | <b>0.910</b> | <b>0.935</b> | 0.545        | <b>0.866</b> | 0.597        | <b>1</b>     |          |              |          |          |
| BS48      | <b>0.866</b> | <b>0.928</b> | 0.522        | <b>0.853</b> | 0.595        | <b>0.955</b> | <b>1</b> |              |          |          |
| CisPt48   | 0.471        | 0.649        | <b>0.997</b> | 0.454        | <b>0.918</b> | 0.572        | 0.543    | <b>1</b>     |          |          |
| 5-FU48    | 0.587        | 0.624        | 0.428        | <b>0.782</b> | 0.500        | <b>0.788</b> | 0.715    | 0.469        | <b>1</b> |          |
| DOX48     | 0.523        | 0.609        | <b>0.837</b> | 0.405        | <b>0.920</b> | 0.552        | 0.520    | <b>0.830</b> | 0.667    | <b>1</b> |

Values in bold show are statistically significant ( $p < 0.05$ ). BVE — dry hydro-ethanolic extract of *Berberis vulgaris* cortex; BS — berberine sulfate hydrate; CisPt — Cisplatin; DOX — Doxorubicin, 5-FU — 5-Fluorouracil; 24 and 48 — treatment time (24 and 48 hours).

**Table S3.** Pearson correlation between BVE secondary metabolites content, antioxidant activity, and cytotoxicity expressed as cell viability % after 24 and 48 hours of treatment.

| Variables | HUVEC<br>24  | HUVEC<br>48   | HEP 24        | HEP 48        | HT 24         | HT 48         | LO 24         | LO 48        | MDA<br>24     | MDA<br>48     | PE 24         | PE 48         | SK 24         | SK 48         | TPC           | TPA           | DPPH          | ABTS          | FRAP          |
|-----------|--------------|---------------|---------------|---------------|---------------|---------------|---------------|--------------|---------------|---------------|---------------|---------------|---------------|---------------|---------------|---------------|---------------|---------------|---------------|
| HUVEC 24  | <b>1</b>     | <b>0.970</b>  | 0.941         | 0.878         | 0.929         | <b>0.968</b>  | 0.926         | 0.746        | 0.942         | 0.872         | 0.894         | 0.818         | <b>0.951</b>  | 0,814         | -0,914        | -0,904        | -0,945        | -0,942        | -0,949        |
| HUVEC 48  | <b>0.970</b> | <b>1</b>      | <b>0.989</b>  | <b>0.959</b>  | <b>0.991</b>  | <b>1.000</b>  | <b>0.988</b>  | 0.882        | <b>0.995</b>  | <b>0.965</b>  | <b>0.976</b>  | 0.932         | <b>0.997</b>  | 0,926         | <b>-0,979</b> | <b>-0,980</b> | <b>-0,996</b> | <b>-0,993</b> | <b>-0,995</b> |
| HEP 24    | 0.941        | <b>0.989</b>  | <b>1</b>      | <b>0.988</b>  | <b>0.994</b>  | <b>0.988</b>  | <b>0.996</b>  | 0.924        | <b>0.985</b>  | <b>0.978</b>  | <b>0.978</b>  | <b>0.959</b>  | <b>0.983</b>  | <b>0,961</b>  | <b>-0,997</b> | <b>-0,979</b> | <b>-0,990</b> | <b>-0,976</b> | <b>-0,979</b> |
| HEP 48    | 0.878        | <b>0.959</b>  | <b>0.988</b>  | <b>1</b>      | <b>0.986</b>  | <b>0.959</b>  | <b>0.990</b>  | <b>0.969</b> | <b>0.967</b>  | <b>0.988</b>  | <b>0.978</b>  | <b>0.986</b>  | <b>0.960</b>  | <b>0,990</b>  | <b>-0,997</b> | <b>-0,976</b> | <b>-0,973</b> | <b>-0,954</b> | <b>-0,955</b> |
| HT 24     | 0.929        | <b>0.991</b>  | <b>0.994</b>  | <b>0.986</b>  | <b>1</b>      | <b>0.991</b>  | <b>0.999</b>  | 0.938        | <b>0.996</b>  | <b>0.991</b>  | <b>0.994</b>  | <b>0.972</b>  | <b>0.994</b>  | <b>0,968</b>  | <b>-0,995</b> | <b>-0,995</b> | <b>-0,998</b> | <b>-0,991</b> | <b>-0,991</b> |
| HT 48     | <b>0.968</b> | <b>1.000</b>  | <b>0.988</b>  | <b>0.959</b>  | <b>0.991</b>  | <b>1</b>      | <b>0.989</b>  | 0.884        | <b>0.996</b>  | <b>0.966</b>  | <b>0.978</b>  | 0.933         | <b>0.998</b>  | 0,927         | <b>-0,979</b> | <b>-0,982</b> | <b>-0,997</b> | <b>-0,994</b> | <b>-0,996</b> |
| LO 24     | 0.926        | <b>0.988</b>  | <b>0.996</b>  | <b>0.990</b>  | <b>0.999</b>  | <b>0.989</b>  | <b>1</b>      | 0.942        | <b>0.993</b>  | <b>0.991</b>  | <b>0.992</b>  | <b>0.974</b>  | <b>0.990</b>  | <b>0,972</b>  | <b>-0,998</b> | <b>-0,992</b> | <b>-0,996</b> | <b>-0,986</b> | <b>-0,987</b> |
| LO 48     | 0.746        | 0.882         | 0.924         | <b>0.969</b>  | 0.938         | 0.884         | 0.942         | <b>1</b>     | 0.913         | <b>0.973</b>  | <b>0.955</b>  | <b>0.993</b>  | 0.900         | <b>0,994</b>  | -0,949        | -0,947        | -0,917        | -0,901        | -0,896        |
| MDA 24    | 0.942        | <b>0.995</b>  | <b>0.985</b>  | <b>0.967</b>  | <b>0.996</b>  | <b>0.996</b>  | <b>0.993</b>  | 0.913        | <b>1</b>      | <b>0.982</b>  | <b>0.992</b>  | <b>0.956</b>  | <b>1.000</b>  | 0,947         | <b>-0,982</b> | <b>-0,995</b> | <b>-0,999</b> | <b>-0,999</b> | <b>-0,999</b> |
| MDA 48    | 0.872        | <b>0.965</b>  | <b>0.978</b>  | <b>0.988</b>  | <b>0.991</b>  | <b>0.966</b>  | <b>0.991</b>  | <b>0.973</b> | <b>0.982</b>  | <b>1</b>      | <b>0.997</b>  | <b>0.994</b>  | <b>0.976</b>  | <b>0,989</b>  | <b>-0,988</b> | <b>-0,995</b> | <b>-0,983</b> | <b>-0,976</b> | <b>-0,974</b> |
| PE 24     | 0.894        | <b>0.976</b>  | <b>0.978</b>  | <b>0.978</b>  | <b>0.994</b>  | <b>0.978</b>  | <b>0.992</b>  | <b>0.955</b> | <b>0.992</b>  | <b>0.997</b>  | <b>1</b>      | <b>0.983</b>  | <b>0.988</b>  | <b>0,975</b>  | <b>-0,984</b> | <b>-1,000</b> | <b>-0,991</b> | <b>-0,989</b> | <b>-0,987</b> |
| PE 48     | 0.818        | 0.932         | <b>0.959</b>  | <b>0.986</b>  | <b>0.972</b>  | 0.933         | <b>0.974</b>  | <b>0.993</b> | <b>0.956</b>  | <b>0.994</b>  | <b>0.983</b>  | <b>1</b>      | 0.946         | <b>0,998</b>  | <b>-0,976</b> | <b>-0,979</b> | <b>-0,958</b> | -0,947        | -0,943        |
| SK 24     | <b>0.951</b> | <b>0.997</b>  | <b>0.983</b>  | <b>0.960</b>  | <b>0.994</b>  | <b>0.998</b>  | <b>0.990</b>  | 0.900        | <b>1.000</b>  | <b>0.976</b>  | <b>0.988</b>  | 0.946         | <b>1</b>      | 0,937         | <b>-0,978</b> | <b>-0,991</b> | <b>-0,999</b> | <b>-0,999</b> | <b>-1,000</b> |
| SK 48     | 0.814        | 0.926         | <b>0.961</b>  | <b>0.990</b>  | <b>0.968</b>  | 0.927         | <b>0.972</b>  | <b>0.994</b> | 0.947         | <b>0.989</b>  | <b>0.975</b>  | <b>0.998</b>  | 0.937         | <b>1</b>      | <b>-0,978</b> | <b>-0,970</b> | <b>-0,951</b> | -0,935        | -0,932        |
| TPC       | -0.914       | <b>-0.979</b> | <b>-0.997</b> | <b>-0.997</b> | <b>-0.995</b> | <b>-0.979</b> | <b>-0.998</b> | -0.949       | <b>-0.982</b> | <b>-0.988</b> | <b>-0.984</b> | <b>-0.976</b> | <b>-0.978</b> | <b>-0.978</b> | <b>1</b>      | <b>0,983</b>  | <b>0,987</b>  | <b>0,972</b>  | <b>0,973</b>  |
| TPA       | -0.904       | <b>-0.980</b> | <b>-0.979</b> | <b>-0.976</b> | <b>-0.995</b> | <b>-0.982</b> | <b>-0.992</b> | -0.947       | <b>-0.995</b> | <b>-0.995</b> | <b>-1.000</b> | <b>-0.979</b> | <b>-0.991</b> | <b>-0.970</b> | <b>0,983</b>  | <b>1</b>      | <b>0,994</b>  | <b>0,993</b>  | <b>0,991</b>  |
| DPPH      | -0.945       | <b>-0.996</b> | <b>-0.990</b> | <b>-0.973</b> | <b>-0.998</b> | <b>-0.997</b> | <b>-0.996</b> | -0.917       | <b>-0.999</b> | <b>-0.983</b> | <b>-0.991</b> | <b>-0.958</b> | <b>-0.999</b> | <b>-0,951</b> | <b>0,987</b>  | <b>0,994</b>  | <b>1</b>      | <b>0,997</b>  | <b>0,998</b>  |
| ABTS      | -0.942       | <b>-0.993</b> | <b>-0.976</b> | <b>-0.954</b> | <b>-0.991</b> | <b>-0.994</b> | <b>-0.986</b> | -0.901       | <b>-0.999</b> | <b>-0.976</b> | <b>-0.989</b> | -0.947        | <b>-0.999</b> | -0,935        | <b>0,972</b>  | <b>0,993</b>  | <b>0,997</b>  | <b>1</b>      | <b>1,000</b>  |
| FRAP      | -0.949       | <b>-0.995</b> | <b>-0.979</b> | <b>-0.955</b> | <b>-0.991</b> | <b>-0.996</b> | <b>-0.987</b> | -0.896       | <b>-0.999</b> | <b>-0.974</b> | <b>-0.987</b> | -0.943        | <b>-1.000</b> | -0,932        | <b>0,973</b>  | <b>0,991</b>  | <b>0,998</b>  | <b>1,000</b>  | <b>1</b>      |

Values in bold are different from 0 with a significance level alpha=0,05



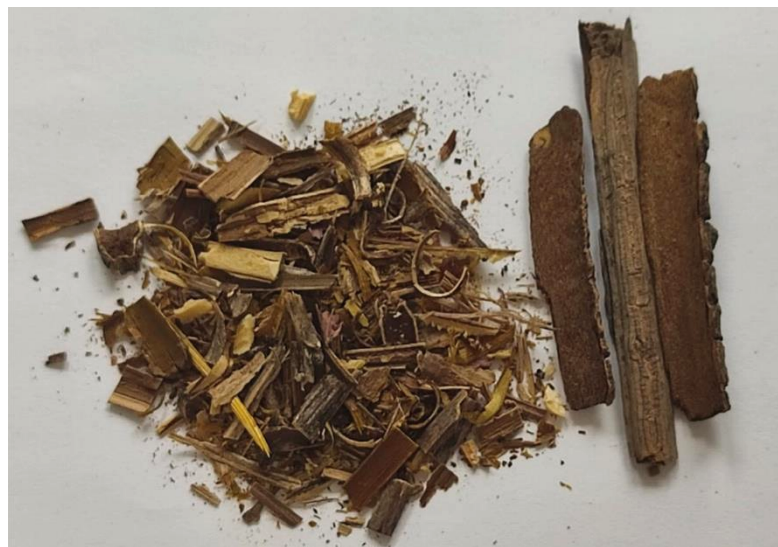

**Figure S4.** Berberidis cortex.
